# Supplementary material for: Exploitation of flow-based procedures for reagentless hydrochlorothiazide determination and accelerated degradation studies of pharmaceutical preparations
Source: Royal Society of Chemistry journal article supplement (doi:10.1039/d0ay02070b), 2020-12-18
Supplement: d0ay02070b3.pdf [file d0ay02070b3.pdf]

## Supplementary Material

### **Exploitation of flow-based procedures for reagentless hydrochlorothiazide determination and accelerated degradation studies of pharmaceutical preparations**

Vivian Maringolo, Alexandre Z. Carvalho, Fernanda C. Aleixo, Diogo L. Rocha\*

*Center on Natural and Human Sciences, Federal University of ABC*

*09210-580 – Santo André – SP – Brazil*

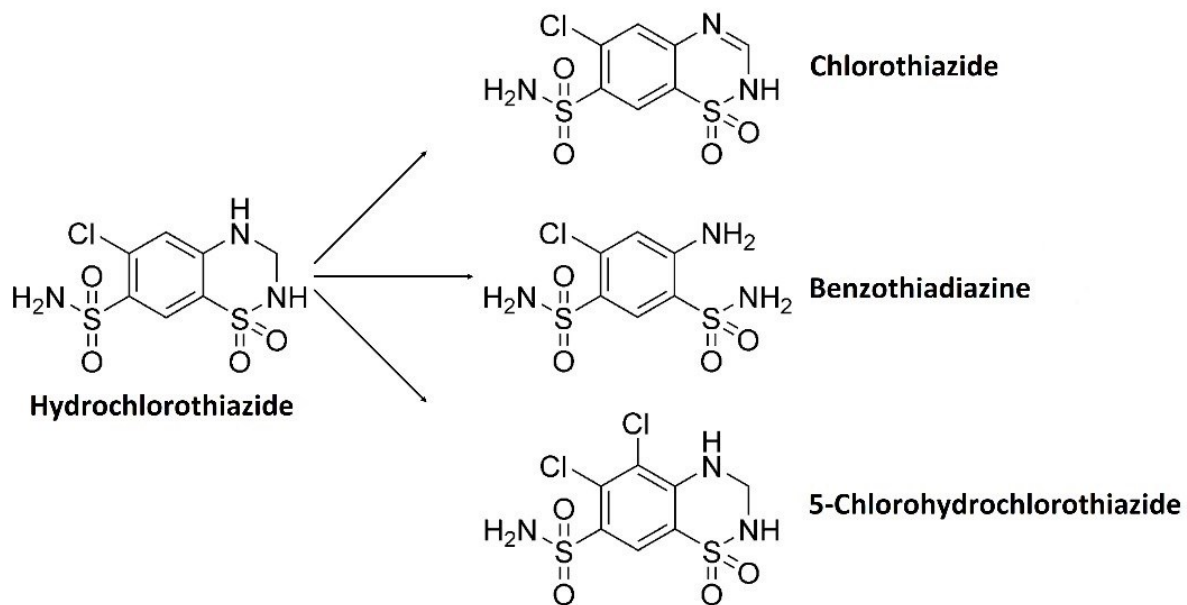

Figure S1. Hydrochlorothiazide and its related compounds.
