# Supplementary figures and images for: Exploitation of flow-based procedures for reagentless hydrochlorothiazide determination and accelerated degradation studies of pharmaceutical preparations
Source: Royal Society of Chemistry journal article supplement (doi:10.1039/d0ay02070b), 2020-12-18

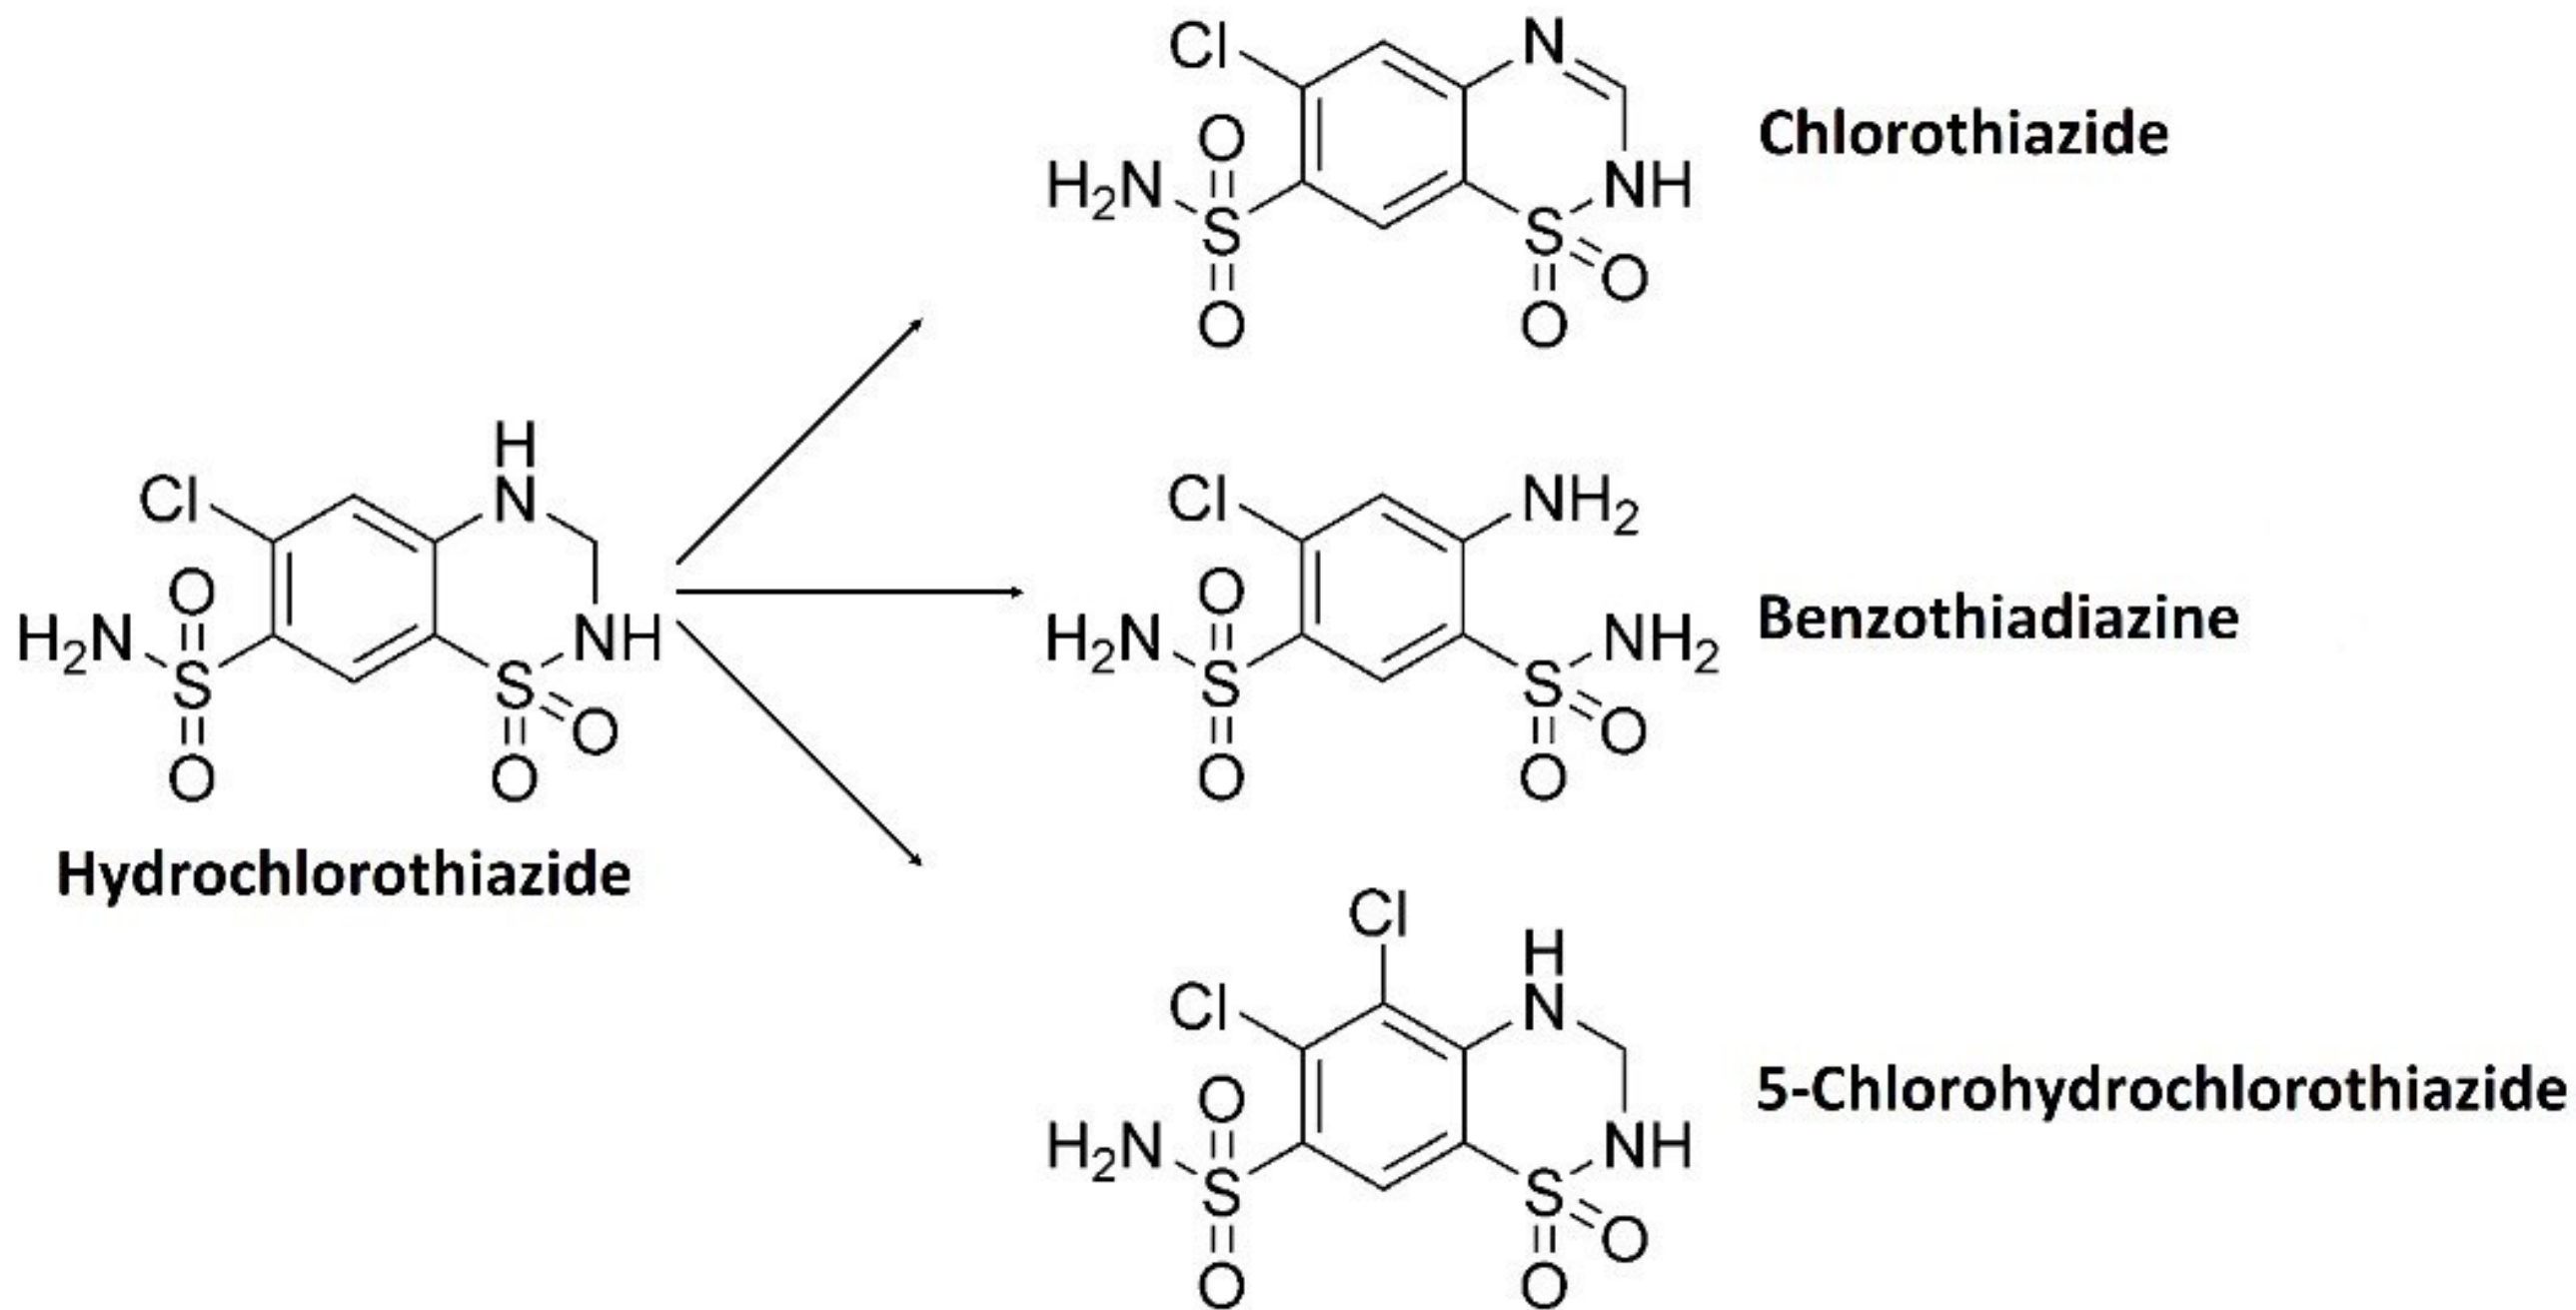

**Figure S1**

Supplement: d0ay02070b2.pdf [file d0ay02070b2.pdf]
